# Supplementary material for: Sex Differences in Cardiovascular Prevention in Type 2: Diabetes in a Real-World Practice Database
Source: MDPI journal article supplement (doi:10.3390/jcm11082196), 2022-04-14
Supplement: s1 [file s1]

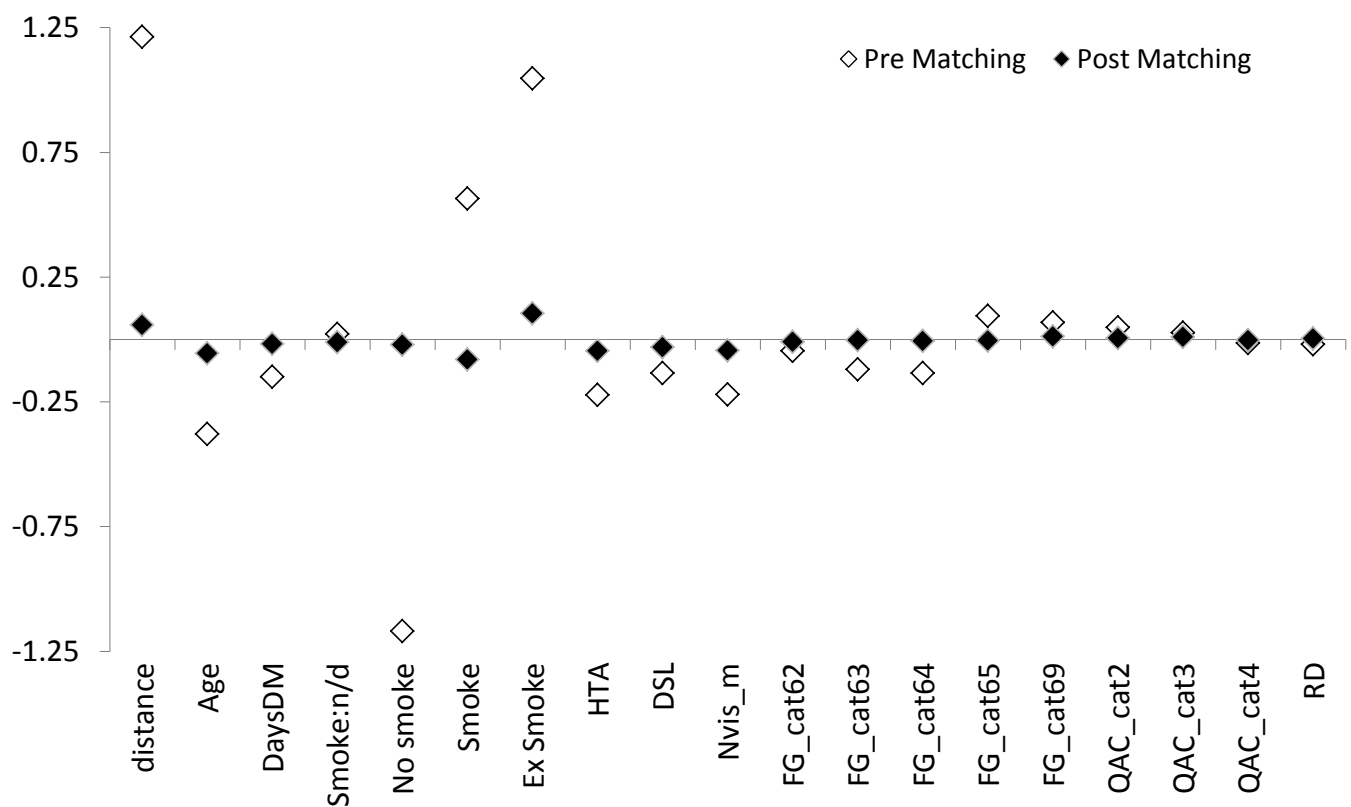

Figure S1. Absolute differences between patients with T2DM according gender in primary prevention (DaysDM, days since type 2 diabetes mellitus diagnosis; Smoke: n/d, smoking status not known; ExSmoke, former smoker; HTA, hypertension; DSL, dyslipidemia; Nvis\_m, number of visits done in primary healthcare last year; FG\_cat62, glomerular filtration rate <15 mL/min; FG\_cat63, glomerular filtration rate 15–30 mL/min; FG\_cat64, glomerular filtration rate 31–44 mL/min; FG\_cat65, glomerular filtration rate 45–59 mL/min; FG\_cat69, glomerular filtration rate >60 mL/min; QAC\_cat2, urinary albumin creatinine ratio <30 mg/g; QAC\_cat3, urinary albumin creatinine ratio 30–300 mg/g; QAC\_cat4, urinary albumin creatinine ratio >300 mg/g; RD, diabetic retinopathy).
